# Supplementary material for: Effect of annealing atmosphere on LiMn2O4 for thin film Li-ion batteries from aqueous chemical solution deposition
Source: Royal Society of Chemistry journal article supplement (doi:10.1039/c6ta08513j), 2016-01-01
Supplement: c6ta08513j1.pdf [file c6ta08513j1.pdf]

## Effect of annealing atmosphere on $\text{LiMn}_2\text{O}_4$ for thin film Li-ion Batteries from aqueous Chemical Solution Deposition.

Received 00th January 20xx,  
Accepted 00th January 20xx

G. Maino,<sup>a</sup> J. D'Haen<sup>b</sup>, F. Mattelaer<sup>c</sup>, C. Detavernier<sup>c</sup>, A. Hardy<sup>a,d</sup> and M. K. Van Bael<sup>a,d</sup>

DOI: 10.1039/x0xx00000x

www.rsc.org/

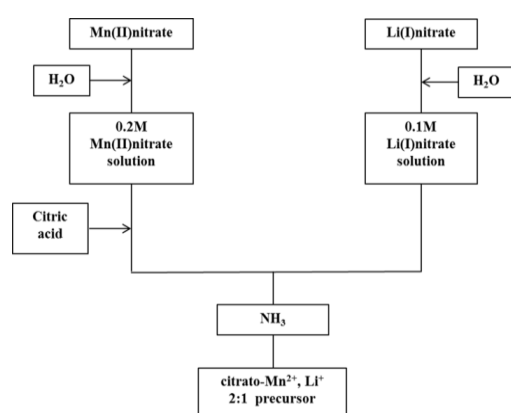

Figure S1: Synthesis scheme of the aqueous precursor solution

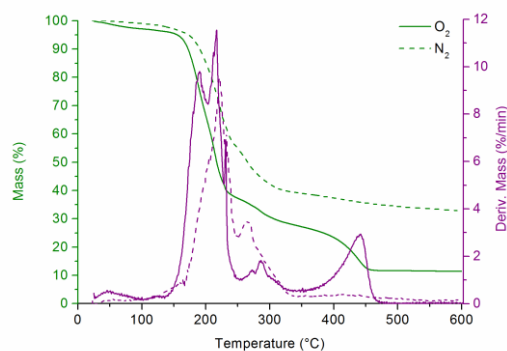

Figure S2: a) TGA (Mass %), DTG (Derivative of mass) analysis of the dried citrate- $\text{Mn}^{2+}$ ,  $\text{Li}^+$  precursor gel. The analyses are performed in  $\text{O}_2$  (solid line) and  $\text{N}_2$  (dashed line).

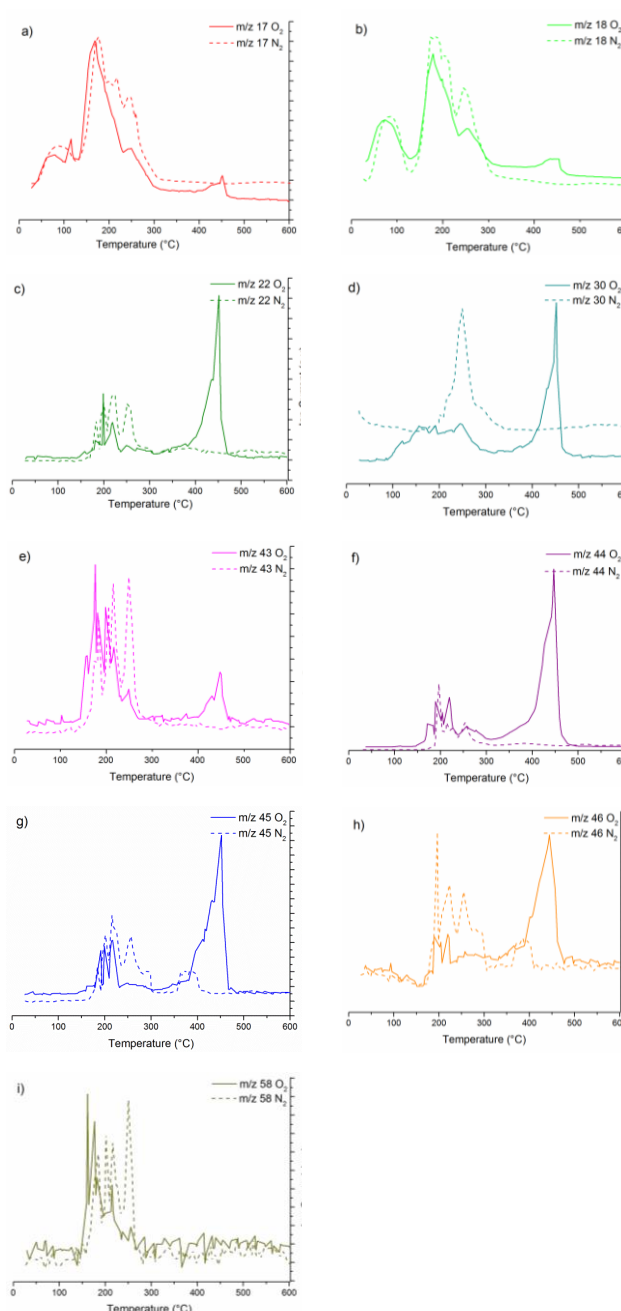

<sup>a</sup>UHasselt – Hasselt University, Institute for materials Research (IMO-IMOMEc), Inorganic and Physical Chemistry, Agoralaan, 3590 Diepenbeek, Belgium

<sup>b</sup>Hasselt University, Institute for Materials Research, Wetenschapspark 1, B-3590 Diepenbeek, Belgium

<sup>c</sup>Gent University, Department Solid State Sciences, Krijgslaan 281 S1, 9000 Gent (Belgium)

<sup>d</sup>imec, division imomec, 3590 Diepenbeek, Belgium

Figure S3 (a-i): TGA-MS profiles of the dried citrate- $Mn^{2+}, Li^+$  precursor gel at 60°C, recorded in  $N_2$  and  $O_2$  at a heating rate of 10°C/min. Ions with  $m/z$  17 ( $OH^+$ ,  $NH_3^+$ ) and 18 ( $H_2O^+$ ,  $NH_4^+$ ) are fragments related to water and ammonia. Ions with  $m/z$  22 ( $CO_2^+$ ), 44 ( $CO_2^+$ ,  $H_2N-C=O^+$ ,  $C_3H_8^+$ ) and 45 ( $^{13}CO_2^+$ ) are fragments related to the carboxylate groups. Ions with  $m/z$  30 ( $NO^+$ ,  $C_2H_6^+$ ,  $H_2N=CH_2^+$ ), 43 ( $HNCO^+$ ,  $C_2H_7^+$ ), 44 ( $CO_2^+$ ,  $H_2N-C=O^+$ ),  $C_3H_8^+$ ) are fragments related to the interaction between carboxylic acid groups and  $NH_3$ . Ions with  $m/z$  46 ( $NO_2^+$ ,  $C_2H_5OH^+$ ) and 58 ( $C_3H_6O^+$ ) together with previous ones ( $m/z$  30, 43, 44) are fragments related to the citrate's skeleton. Only the most relevant fragments are shown and cited in the article. Note that each sub-figure has its own ion current scale.

It can be noted that fragments 30 ( $NO^+$ ,  $C_2H_6^+$ ,  $H_2N=CH_2^+$ ), 43 ( $HNCO^+$ ,  $C_2H_7^+$ ) and 44 ( $CO_2^+$ ,  $H_2N-C=O^+$ ) evolve at lower temperature in  $O_2$  atmosphere (180-190°C) motivating partially the faster mass lost in oxidative atmosphere around the same temperature.

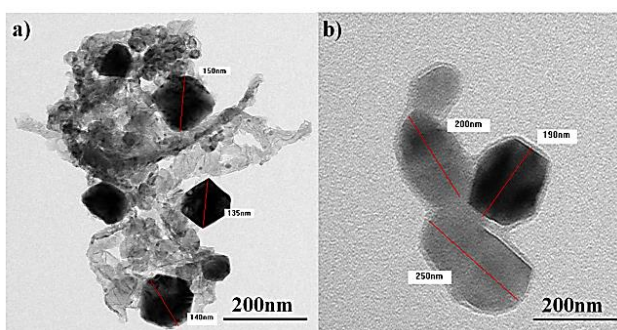

Figure S4: TEM images of powders obtained after calcining dried precursor gels at 450 °C for 1h in a)  $N_2$  and b)  $O_2$

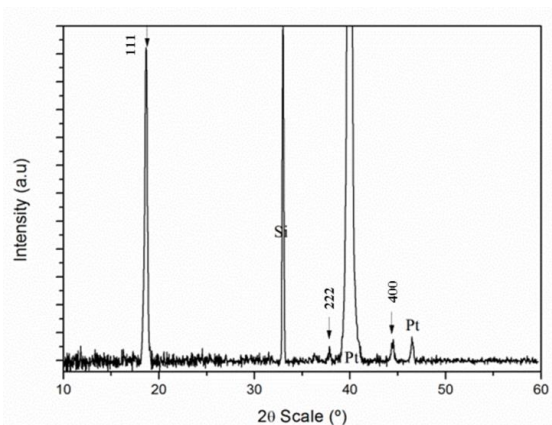

Figure S5: XRD of film on  $Si/SiO_2/TiN/Pt$  substrate, heated at 450°C for 1h in  $N_2$ . Arrow represents  $LiMn_2O_4$  face centered cubic spinel phase (JCPDS 89-0117).

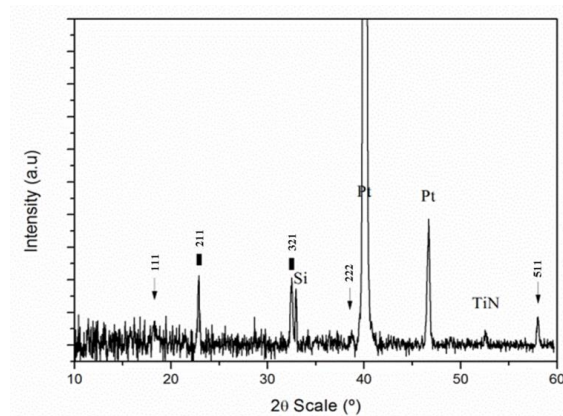

Figure S6: XRD of film on  $Si/SiO_2/TiN/Pt$  substrate, heated at 450°C for 1h in  $O_2$ . Arrow represents  $LiMn_2O_4$  face centered cubic spinel phase (JCPDS 89-0117), square represents gamma  $Mn_2O_3$  tetragonal (JCPDS 06-0540).

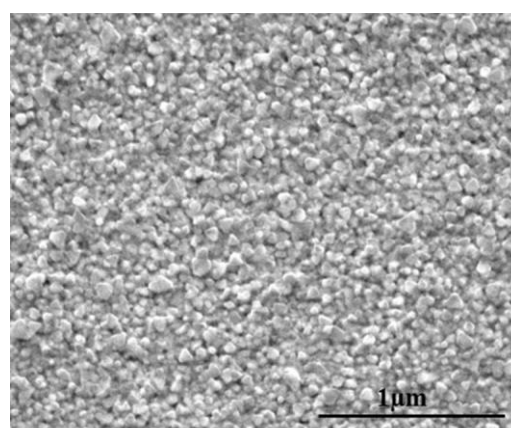

Figure S7: SEM Pictures of films on  $Si/SiO_2/TiN/Pt$ , annealed in  $N_2$  at 450°C

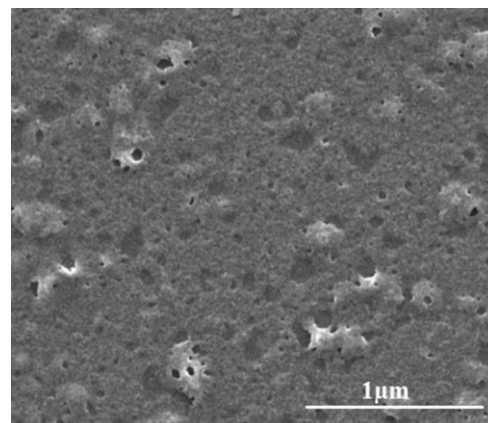

Figure S8: SEM Pictures of films on  $Si/SiO_2/TiN/Pt$ , annealed in  $O_2$  at 450°C for 1h at 10°C/min.

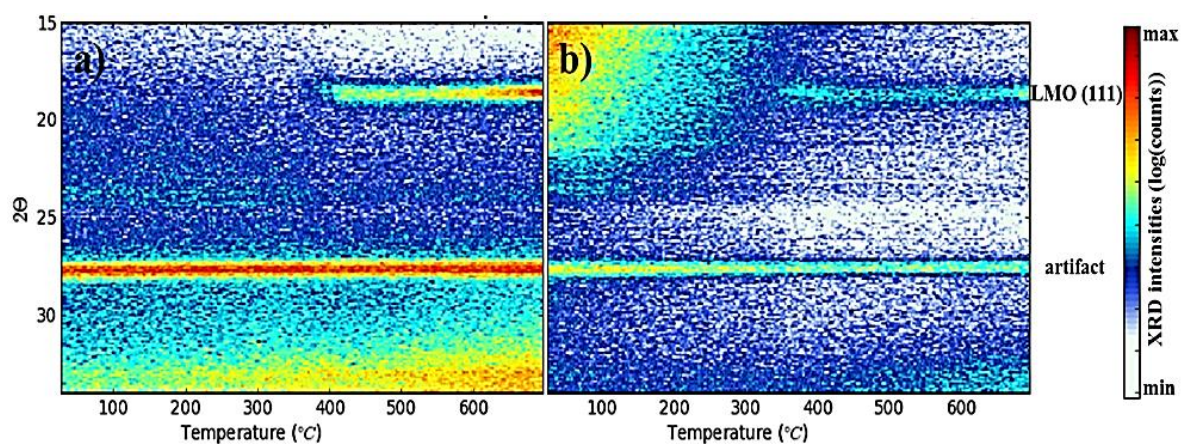

Figure S9: In-situ XRD of spincoated films on Si substrate, recorded in  $N_2$  and  $O_2$  at a heating rate of  $12\text{ }^\circ\text{C}\cdot\text{min}^{-1}$ . The reflection at  $27,5^\circ 2\theta$  originates from a detector artifact.

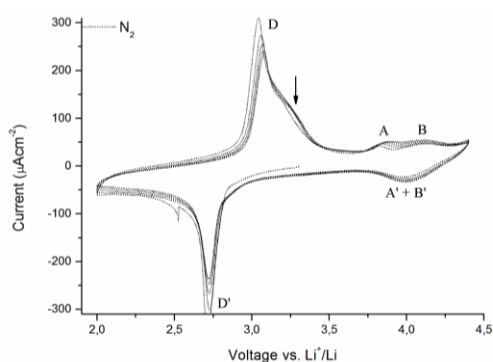

Figure S10: Cyclic Voltammogram (first 5 cycles,  $10\text{mV}/\text{sec}$ ) of the films onto Si/Si/SiO<sub>2</sub>/TiN/Pt, after annealing at  $800\text{ }^\circ\text{C}$  for 3h in  $N_2$

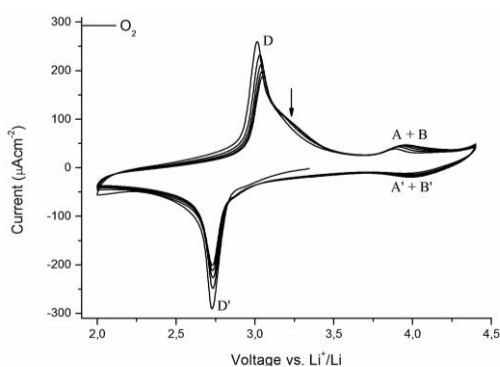

Figure S11: Cyclic Voltammogram (first 5 cycles,  $10\text{mV}/\text{sec}$ ) of the films onto Si/Si/SiO<sub>2</sub>/TiN/Pt, after annealing at  $800\text{ }^\circ\text{C}$  for 3h in  $O_2$
